# Supplementary material
Source: ML conference proceedings conference paper supplement (https://openreview.net/forum?id=16WMyqeYgw)
Supplement: supplementary_material [file attachment]

## A UPDATING FORMULA IN VARIANCE ESTIMATION

Here we show that the weighted standard deviation in equation 6 can be obtained by updating  $\sigma$  with formula 7 in Variance Estimation. For simplicity, the inputs to all the following functions are hidden as they are the same state-action pair  $(s, a)$ .

While being updated with equation 1, we have

$$Q_n = (1 - \alpha)^n Q_0 + \sum_{i=1}^n \alpha (1 - \alpha)^{n-i} G_i \quad (13)$$

$$= \alpha \sum_{i=1}^n (1 - \alpha)^{n-i} G_i \quad (14)$$

The equal sign in formula 14 is established by setting  $Q_0 = 0$ .

If we expand  $1/\alpha$  as a power series

$$\frac{1}{\alpha} = \frac{1 - (1 - \alpha)^n}{1 - (1 - \alpha)} \cdot \frac{1}{1 - (1 - \alpha)^n} \quad (15)$$

$$= \sum_{i=0}^{n-1} (1 - \alpha)^i \cdot \frac{1}{1 - (1 - \alpha)^n} \quad (16)$$

$$\approx \sum_{i=0}^{n-1} (1 - \alpha)^i \quad (17)$$

$$= \sum_{i=1}^n (1 - \alpha)^{n-i} \quad (18)$$

The approximate sign is used here to reflect that the second term of the multiplication approximates 1 as  $n \rightarrow \infty$  because  $\alpha \in (0, 1]$ . The value function can be re-written as an exponentially weighted sum of the return sequence by applying the above expansion of power series:

$$Q_n \approx \frac{\sum_{i=1}^n (1 - \alpha)^{n-i} G_i}{\sum_{i=1}^n (1 - \alpha)^{n-i}} \quad (19)$$

We denote  $A_n = \sum_{i=1}^n (1 - \alpha)^{n-i}$ , then

$$\sigma_{n+1}^2 = \frac{\sum_{i=1}^{n+1} (1 - \alpha)^{n+1-i} (G_i - Q_{n+1})^2}{A_{n+1}} \quad (20)$$

$$= \frac{\sum_{i=1}^n (1 - \alpha)^{n+1-i} (G_i - Q_{n+1})^2}{A_{n+1}} + \frac{(G_{n+1} - Q_{n+1})^2}{A_{n+1}} \quad (21)$$

$$= (1 - \alpha) \cdot \frac{\sum_{i=1}^n (1 - \alpha)^{n-i} (G_i - Q_{n+1})^2}{A_{n+1}} + \frac{(G_{n+1} - Q_{n+1})^2}{A_{n+1}} \quad (22)$$

$$= (1 - \alpha) \cdot \frac{\sum_{i=1}^n (1 - \alpha)^{n-i} (G_i - Q_n + Q_n - Q_{n+1})^2}{A_{n+1}} + \frac{(G_{n+1} - Q_{n+1})^2}{A_{n+1}} \quad (23)$$

$$= (1 - \alpha) \cdot \left[ \frac{\sum_{i=1}^n (1 - \alpha)^{n-i} (G_i - Q_n)^2}{A_{n+1}} + \frac{\sum_{i=1}^n (1 - \alpha)^{n-i} (Q_n - Q_{n+1})^2}{A_{n+1}} \right. \\ \left. + \frac{2 \sum_{i=1}^n (1 - \alpha)^{n-i} (G_i - Q_n)(Q_n - Q_{n+1})}{A_{n+1}} \right] + \frac{(G_{n+1} - Q_{n+1})^2}{A_{n+1}} \quad (24)$$

$$\approx (1 - \alpha) \cdot \frac{A_n}{A_{n+1}} \cdot [\sigma_n^2 + (Q_{n+1} - Q_n)^2 + 0] + \frac{(G_{n+1} - Q_{n+1})^2}{A_{n+1}} \quad (25)$$

$$\approx (1 - \alpha) [\sigma_n^2 + (Q_{n+1} - Q_n)^2] + \alpha (G_{n+1} - Q_{n+1})^2 \quad (26)$$

where the first approximate sign comes from formula 19 and the second one comes from formula 17.

Though the updating formula is biased as  $n$  doesn't approach infinity in practice, the bias is negligible. Because all the above approximations are rooted in formula 17 and  $(1 - \alpha)^n$  converges to 0 rapidly as  $n$  grows.

## B AN EMPIRICAL ANALYSIS

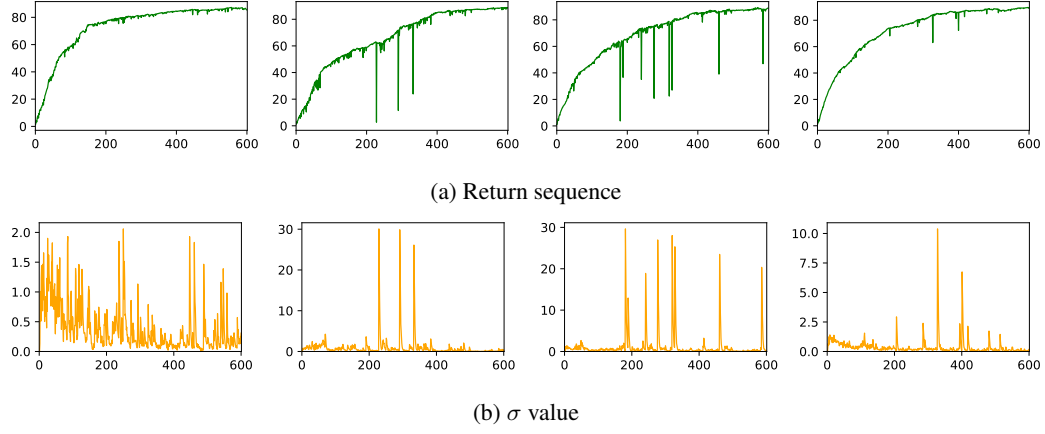

Figure 5: Raw return sequences (a) and corresponding  $\sigma$  values (b) over visitations.

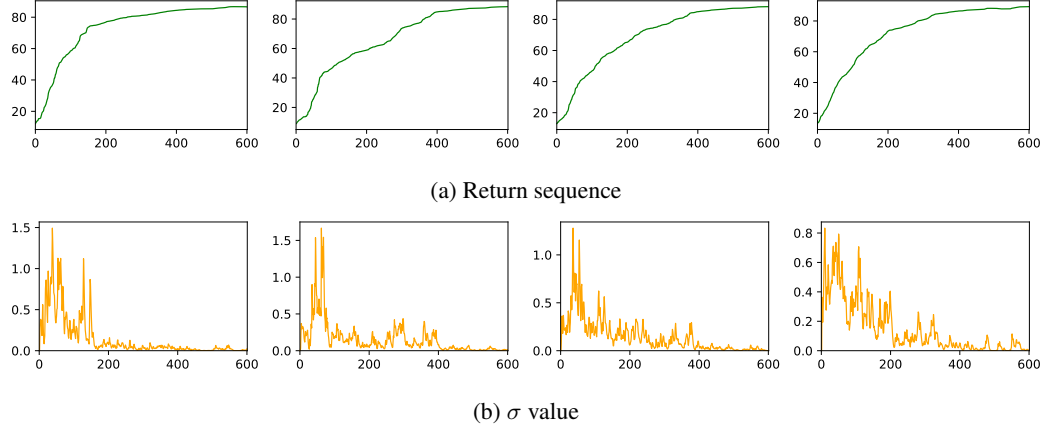

Figure 6: Smoothed return sequences (a) and corresponding  $\sigma$  values (b) over visitations.

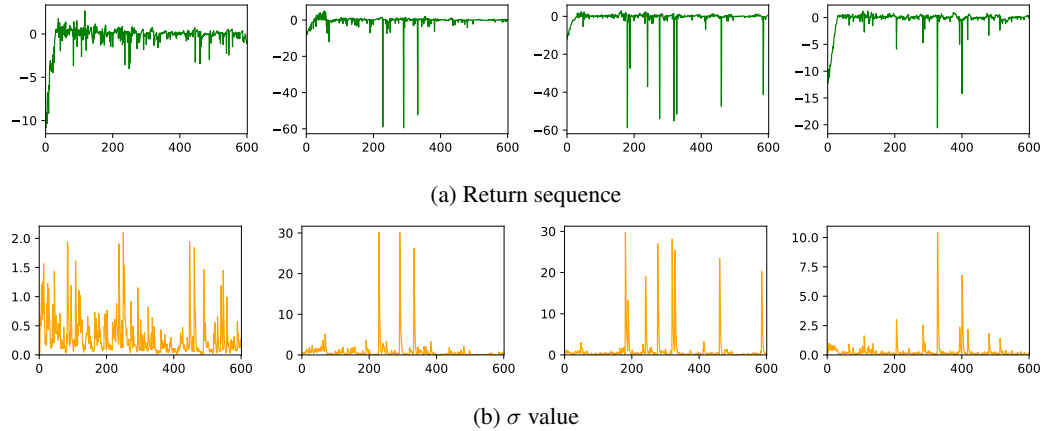

Figure 7: Residual return sequences (a) and corresponding  $\sigma$  values (b) over visitations.

Sutton & Barto (2018) prove that the policy and value functions monotonically improve over sweeps in policy iteration. In this simple form, return sequences for individual state-action pairs are monotonically increasing and usually converge fast. However, the same statement is not true when the policy is updated with Monte Carlo settings where the returns are random samples. In this situation, fluctuations in returns are inevitable due to the stochastic property; an incremental updating scheme is adopted to stabilize learning as well as avoid the excessive impact of malicious samples.

Here we illustrate the characteristics of the return sequences and analyze how variance guides exploration. The raw return sequences shown in Figure 5a(a) are randomly sampled from frequently visited state-action pairs in the Cartpole balancing problem and truncated to be of the same length. To disentangle the impact of the convergence trend from transient fluctuations, smoothed versions of those sequences are extracted from the raw sequences (shown in Figure 6a), while the residuals are shown in Figure 7a. Then we apply our Variance Estimation method on each of the sequences independently and show the  $\sigma$  values over visits below the sequences.

While  $\sigma$  values are integrated into the Q values used by our exploration policy (shown in Equation 5), a greater  $\sigma$  value usually results in an increase in exploration budget. Meanwhile, the nature of weighted sum balances the importance of learned Q value and the history of its change which is captured by  $\sigma$ .

In Figure 6b, we observe that the  $\sigma$  value is greater when the return sequence changes at a faster rate. As the sequence converges, the  $\sigma$  value approaches zero. An interesting but unobvious observation is that the  $\sigma$  value spikes when there is change in the convergence rate of the return sequence. Since variance is essentially a Euclidean distance metric, it is capable of capturing second-order information.

Sequences in Figure 7a isolate the impacts of transient fluctuations from the overall trend. We observe that whenever there an excessive fluctuation appears,  $\sigma$  value spikes to a high magnitude to demand immediate exploration. Once the return goes back to its normal range, the  $\sigma$  value decreases simultaneously. Those quick responses are useful since excessive fluctuations are harmful to the estimation of Q values. A timely investigation of exploration budget eliminates this negative impact before it propagates to more states. Meanwhile, frequent fluctuations beget an increase in  $\sigma$  value and result in more exploration to determine its value.

In conclusion, the exploration policy on our constructed upper bound effectively allocates exploration budget to accelerate convergence in important states as well as alleviate the impact of fluctuations.

## C HYPERPARAMETERS

Table 2: Atari DQN Hyperparameters

| Hyperparameter             | Value     | Description                                                                                                       |
|----------------------------|-----------|-------------------------------------------------------------------------------------------------------------------|
| $c_{V-DQN}$                | 0.1       | Weighting factor of $\sigma$ -stream in exploration policy in V-DQN                                               |
| $c_{TD-DQN}$               | 0.1       | Weighting factor of $\sigma$ -stream in exploration policy in TD-DQN                                              |
| mini-batch size            | 32        | Size of mini-batch sample for gradient step                                                                       |
| replay buffer size         | 1M        | Maximum number of transitions stored in the replay buffer                                                         |
| initial replay buffer size | 50K       | Number of transitions stored in the replay buffer before optimization starts                                      |
| optimization frequency     | 4         | Number of actions the agent takes between successive network optimization steps                                   |
| update frequency           | 30000     | Number of steps between consecutive target updates                                                                |
| $\epsilon_{init}$          | 1.00      | Initial exploration rate of $\epsilon$ -greedy method                                                             |
| $\epsilon_{final}$         | 0.01      | Final exploration rate of $\epsilon$ -greedy method                                                               |
| $N_{\epsilon}$             | 1M        | Number of actions that the exploration rate of $\epsilon$ -greedy method decays from initial value to final value |
| $\alpha$                   | 0.0000625 | Adam optimizer learning rate                                                                                      |
| $\epsilon_{ADAM}$          | 0.00015   | Adam optimizer parameter                                                                                          |
| evaluation frequency       | 250K      | Number of actions between successive evaluation runs                                                              |
| evaluation length          | 125K      | Number of actions per evaluation run                                                                              |
| evaluation episode length  | 27K       | Maximum number of action in an episode in evaluation runs                                                         |
| max no-op                  | 30        | Maximum number of no-op actions before the episode starts                                                         |

## D EXPERIMENTAL RESULTS ON ATARI GAMES

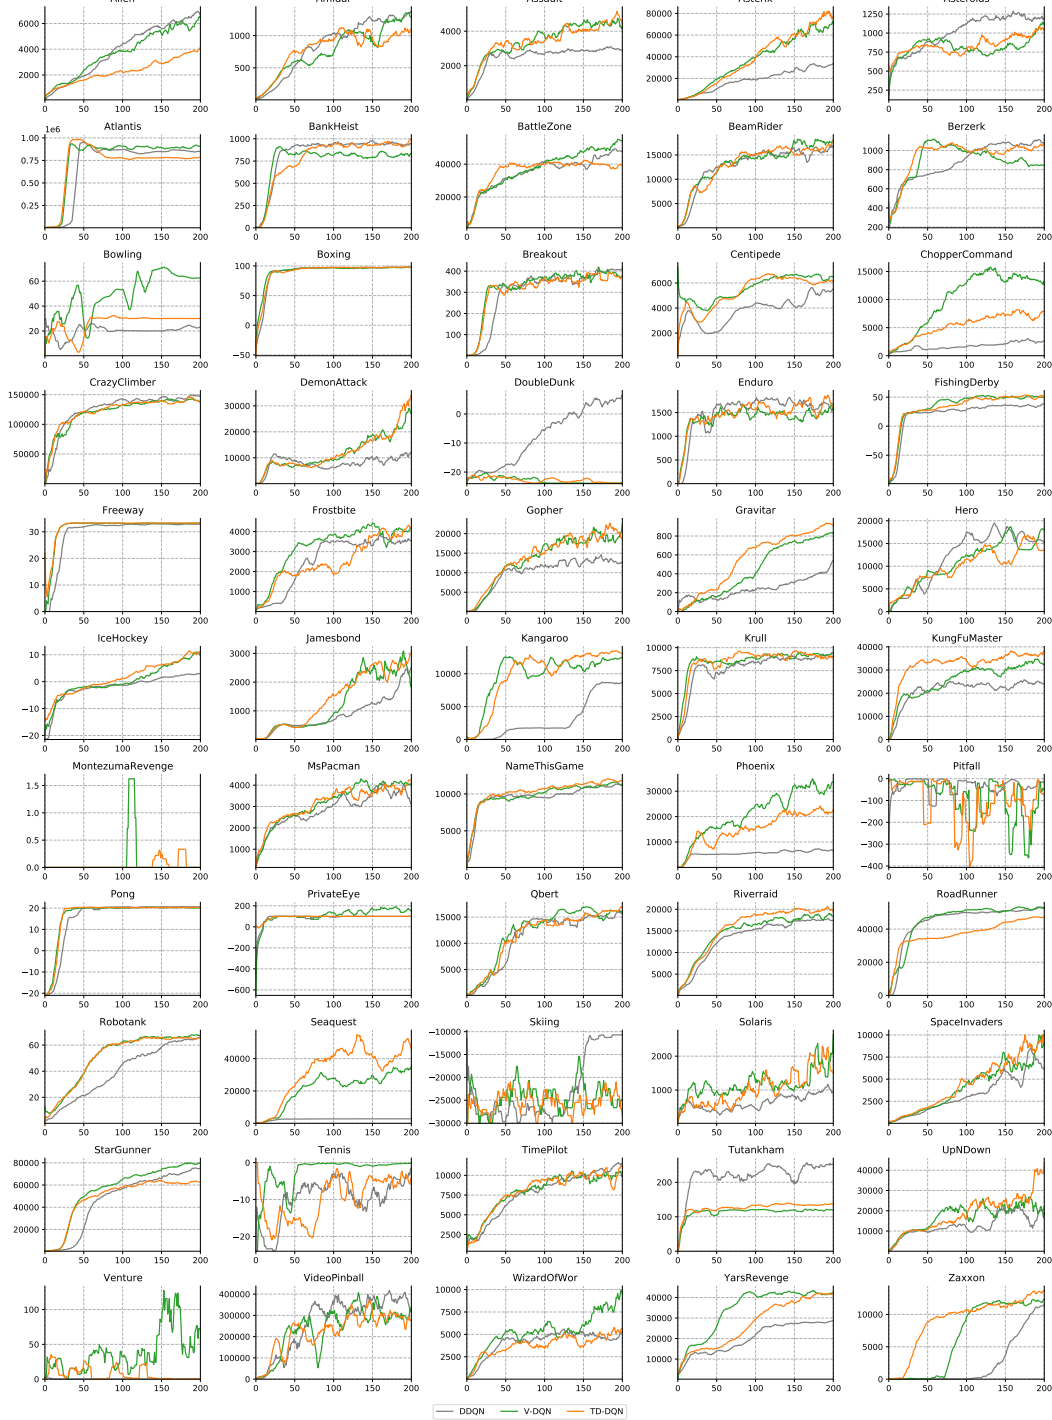

Figure 8: Training curve on Atari games from a single training run each. Episodes start with up to 30 no-op actions. Each data point is an average of episode rewards from 500K frames of evaluation runs, and smoothed over 10 data points.

| Game             | DDQN         | V-DQN        | TD-DQN       |
|------------------|--------------|--------------|--------------|
| Alien            | 123%         | <b>130%</b>  | 76%          |
| Amidar           | <b>99%</b>   | 97%          | 97%          |
| Assault          | 764%         | <b>1659%</b> | 1324%        |
| Asterix          | 537%         | 1280%        | <b>1490%</b> |
| Asteroids        | <b>2%</b>    | 1%           | 1%           |
| Atlantis         | 7445%        | 7334%        | <b>7714%</b> |
| BankHeist        | 165%         | 158%         | <b>170%</b>  |
| BattleZone       | 168%         | <b>199%</b>  | 149%         |
| BeamRider        | 143%         | 153%         | <b>156%</b>  |
| Berzerk          | <b>51%</b>   | 49%          | 49%          |
| Bowling          | 7%           | <b>52%</b>   | 18%          |
| Boxing           | 902%         | 903%         | <b>904%</b>  |
| Breakout         | 1764%        | <b>1851%</b> | 1644%        |
| Centipede        | 57%          | 64%          | <b>64%</b>   |
| ChopperCommand   | 39%          | <b>237%</b>  | 111%         |
| CrazyClimber     | 639%         | <b>658%</b>  | 646%         |
| DemonAttack      | 563%         | 1415%        | <b>1700%</b> |
| DoubleDunk       | <b>1568%</b> | -145%        | -90%         |
| Enduro           | 267%         | <b>284%</b>  | 281%         |
| FishingDerby     | 151%         | <b>164%</b>  | 164%         |
| Freeway          | 130%         | <b>131%</b>  | 131%         |
| Frostbite        | 108%         | <b>116%</b>  | 112%         |
| Gopher           | 1071%        | <b>1689%</b> | 1665%        |
| Gravitar         | 14%          | 22%          | <b>25%</b>   |
| Hero             | <b>83%</b>   | 81%          | 82%          |
| IceHockey        | 139%         | 227%         | <b>253%</b>  |
| Jamesbond        | 890%         | <b>1315%</b> | 1071%        |
| Kangaroo         | 354%         | 529%         | <b>552%</b>  |
| Krull            | 909%         | 917%         | <b>931%</b>  |
| KungFuMaster     | 150%         | 199%         | <b>214%</b>  |
| MontezumaRevenge | -1%          | <b>-0%</b>   | -1%          |
| MsPacman         | 32%          | <b>33%</b>   | 29%          |
| NameThisGame     | 207%         | 210%         | <b>218%</b>  |
| Phoenix          | 134%         | <b>852%</b>  | 531%         |
| Pitfall          | 5%           | <b>5%</b>    | 5%           |
| Pong             | <b>116%</b>  | 115%         | 115%         |
| PrivateEye       | -1%          | <b>-1%</b>   | -1%          |
| Qbert            | 146%         | 150%         | <b>160%</b>  |
| Riverraid        | 136%         | 152%         | <b>156%</b>  |
| RoadRunner       | 826%         | <b>827%</b>  | 724%         |
| Robotank         | 1006%        | <b>1071%</b> | 1051%        |
| Seaquest         | 6%           | 122%         | <b>226%</b>  |
| Skiing           | <b>43%</b>   | 37%          | 35%          |
| Solaris          | -5%          | <b>50%</b>   | 40%          |
| SpaceInvaders    | 889%         | <b>1527%</b> | 1318%        |
| StarGunner       | 922%         | <b>984%</b>  | 760%         |
| Tennis           | <b>197%</b>  | 147%         | 146%         |
| TimePilot        | <b>387%</b>  | 365%         | 366%         |
| Tutankham        | <b>215%</b>  | 108%         | 109%         |
| UpNDown          | 366%         | 516%         | <b>707%</b>  |
| Venture          | -1%          | <b>36%</b>   | 18%          |
| VideoPinball     | 425%         | <b>425%</b>  | 425%         |
| WizardOfWor      | 168%         | <b>309%</b>  | 206%         |
| YarsRevenge      | 61%          | <b>98%</b>   | 95%          |
| Zaxxon           | 151%         | 175%         | <b>183%</b>  |

Table 3: Normalized scores.

| Game             | Random   | Human   | DDQN            | V-DQN           | TD-DQN           |
|------------------|----------|---------|-----------------|-----------------|------------------|
| Alien            | 128.3    | 6371.3  | 7807.3          | <b>8236.9</b>   | 4895.4           |
| Amidar           | 11.8     | 1540.4  | <b>1521.6</b>   | 1495.0          | 1494.0           |
| Assault          | 166.9    | 628.9   | 3697.5          | <b>7829.8</b>   | 6284.9           |
| Asterix          | 164.5    | 7536.0  | 39782.0         | 94509.1         | <b>110013.6</b>  |
| Asteroids        | 871.3    | 36517.3 | <b>1464.3</b>   | 1317.6          | 1278.0           |
| Atlantis         | 13463.0  | 26575.0 | 989675.0        | 975100.0        | <b>1024975.0</b> |
| BankHeist        | 21.7     | 644.5   | 1050.1          | 1007.7          | <b>1082.3</b>    |
| BattleZone       | 3560.0   | 33030.0 | 53153.8         | <b>62133.3</b>  | 47460.0          |
| BeamRider        | 254.6    | 14961.0 | 21296.0         | 22765.7         | <b>23234.0</b>   |
| Berzerk          | 196.1    | 2237.5  | <b>1228.1</b>   | 1205.0          | 1190.7           |
| Bowling          | 35.2     | 146.5   | 42.7            | <b>93.6</b>     | 54.7             |
| Boxing           | -1.5     | 9.6     | 98.6            | 98.7            | <b>98.8</b>      |
| Breakout         | 1.6      | 27.9    | 465.5           | <b>488.3</b>    | 434.1            |
| Centipede        | 1925.5   | 10321.9 | 6695.1          | 7271.9          | <b>7282.8</b>    |
| ChopperCommand   | 644.0    | 8930.0  | 3900.0          | <b>20289.7</b>  | 9835.0           |
| CrazyClimber     | 9337.0   | 32667.0 | 158346.2        | <b>162828.0</b> | 159952.0         |
| DemonAttack      | 208.3    | 3442.8  | 18418.2         | 45977.5         | <b>55200.6</b>   |
| DoubleDunk       | -16.0    | -14.4   | <b>9.1</b>      | -18.3           | -17.4            |
| Enduro           | -81.8    | 740.2   | 2113.5          | <b>2250.2</b>   | 2225.0           |
| FishingDerby     | -77.1    | 5.1     | 46.6            | <b>57.7</b>     | 57.7             |
| Freeway          | 0.1      | 25.6    | 33.2            | <b>33.6</b>     | 33.6             |
| Frostbite        | 66.4     | 4202.8  | 4516.2          | <b>4883.8</b>   | 4702.4           |
| Gopher           | 250.0    | 2311.0  | 22331.4         | <b>35061.4</b>  | 34555.7          |
| Gravitar         | 245.5    | 3116.0  | 637.5           | 869.5           | <b>976.1</b>     |
| Hero             | 1580.3   | 25839.4 | <b>21606.6</b>  | 21244.0         | 21476.5          |
| IceHockey        | -9.7     | 0.5     | 4.5             | 13.5            | <b>16.1</b>      |
| Jamesbond        | 33.5     | 368.5   | 3014.2          | <b>4438.8</b>   | 3622.5           |
| Kangaroo         | 100.0    | 2739.0  | 9450.0          | 14057.6         | <b>14679.4</b>   |
| Krull            | 1151.9   | 2109.1  | 9855.5          | 9930.0          | <b>10065.0</b>   |
| KungFuMaster     | 304.0    | 20786.8 | 31070.7         | 40984.4         | <b>44177.4</b>   |
| MontezumaRevenge | 25.0     | 4182.0  | 0.0             | <b>9.1</b>      | 3.3              |
| MsPacman         | 197.8    | 15375.0 | 5038.5          | <b>5246.7</b>   | 4585.7           |
| NameThisGame     | 1747.8   | 6796.0  | 12181.1         | 12359.4         | <b>12774.7</b>   |
| Phoenix          | 1134.4   | 6686.2  | 8568.6          | <b>48424.7</b>  | 30623.9          |
| Pitfall          | -348.8   | 5998.9  | 0.0             | <b>0.0</b>      | 0.0              |
| Pong             | -18.0    | 15.5    | <b>20.8</b>     | 20.6            | 20.6             |
| PrivateEye       | 662.8    | 64169.1 | 100.0           | <b>200.0</b>    | 100.0            |
| Qbert            | 183.0    | 12085.0 | 17551.4         | 18051.7         | <b>19250.0</b>   |
| Riverraid        | 588.3    | 14382.2 | 19322.9         | 21545.0         | <b>22073.8</b>   |
| RoadRunner       | 200.0    | 6878.0  | 55381.7         | <b>55437.1</b>  | 48526.7          |
| Robotank         | 2.4      | 8.9     | 67.8            | <b>72.0</b>     | 70.7             |
| Seaquest         | 215.5    | 40425.8 | 2789.8          | 49230.8         | <b>91277.1</b>   |
| Skiing           | -15287.4 | -3686.6 | <b>-10314.1</b> | -10990.9        | -11215.2         |
| Solaris          | 2047.2   | 11032.6 | 1572.0          | <b>6497.6</b>   | 5615.0           |
| SpaceInvaders    | 182.6    | 1464.9  | 11580.8         | <b>19757.7</b>  | 17086.2          |
| StarGunner       | 697.0    | 9528.0  | 82076.7         | <b>87577.8</b>  | 67768.6          |
| Tennis           | -21.4    | -6.7    | <b>7.5</b>      | 0.2             | 0.0              |
| TimePilot        | 3273.0   | 5650.0  | <b>12460.7</b>  | 11941.4         | 11975.0          |
| Tutankham        | 12.7     | 138.3   | <b>283.0</b>    | 147.8           | 150.1            |
| UpNDown          | 707.2    | 9896.1  | 34346.4         | 48118.3         | <b>65673.9</b>   |
| Venture          | 18.0     | 1039.0  | 9.6             | <b>382.9</b>    | 197.1            |
| VideoPinball     | 20452.0  | 15641.1 | 584388.2        | <b>632013.8</b> | 631348.0         |
| WizardOfWor      | 804.0    | 4556.0  | 7115.1          | <b>12388.1</b>  | 8551.7           |
| YarsRevenge      | 1476.9   | 47135.2 | 29332.9         | <b>46319.6</b>  | 44894.4          |
| Zaxxon           | 475.0    | 8443.0  | 12488.4         | 14409.8         | <b>15028.3</b>   |

Table 4: Raw Scores.
